# Supplementary material
Source: PubMed Central journal article supplement (PMC5937541)
Supplement: NIHMS932092-supplement-supplement_1.pdf [file NIHMS932092-supplement-supplement_1.pdf]

2015.

**Supplementary Table 1**  
**Authentic and Suspected Authentic E-cigarette Refill Fluids<sup>a</sup>**

| #  | Co <sup>b</sup> | Flavor              | [Q] (mg/mL) <sup>c</sup> | Coloration <sup>d</sup> | QR <sup>e</sup> | EAN <sup>f</sup> | Mfr. Name <sup>g</sup> | Product Name on Database |
|----|-----------------|---------------------|--------------------------|-------------------------|-----------------|------------------|------------------------|--------------------------|
| 1  | NG-L            | Two Apples          | 0.4 ± 0.1                | Yellow                  | C               | C                | RGHK                   | No record found          |
| 2  | NG-L            | Two Apples          | 0.6 ± 0.1                | Light yellow            | C               | C                | RGHK                   | No record found          |
| 3  | NG-L            | Strawberry          | ND                       | Clear                   | C               | C                | RGHK                   | Strawberry(0mg)          |
| 4  | NG-L            | Menthol             | ND                       | Clear w/ GT             | C               | C                | RGHK                   | Menthol(0mg)             |
| 5  | NG-L            | Menthol             | ND                       | Clear w/ GT             | C               | C                | RGHK                   | Menthol(0mg)             |
| 6  | NG-L            | Menthol             | ND                       | Clear w/ GT             | C               | C                | RGHK                   | Menthol(0mg)             |
| 7  | NG-L            | Vanilla             | ND                       | Clear                   | C               | C                | RGHK                   | Vanilla(0mg)             |
| 8  | NG-L            | Vanilla             | ND                       | Clear                   | C               | C                | RGHK                   | Vanilla(0mg)             |
| 9  | NG-L            | Vanilla             | ND                       | Clear                   | C               | C                | RGHK                   | Vanilla(0mg)             |
| 10 | NG-L            | Vanilla             | ND                       | Clear                   | C               | C                | RGHK                   | Vanilla(0mg)             |
| 11 | NG-L            | Vanilla             | ND                       | Clear                   | C               | C                | RGHK                   | Vanilla(0mg)             |
| 12 | NG-L            | Vanilla             | ND                       | Clear                   | C               | C                | RGHK                   | Vanilla(0mg)             |
| 13 | NG-L            | Vanilla             | ND                       | Clear                   | C               | C                | RGHK                   | Vanilla(0mg)             |
| 14 | US-K            | Two Apples          | 0.5 ± 0.0                | Yellow                  | C               | C                | RGHK                   | No record found          |
| 15 | US-K            | Two Mints           | ND                       | Clear                   | C               | C                | RGHK                   | No record found          |
| 16 | US-K            | Peach               | ND                       | Clear                   | C               | C                | RGHK                   | No record found          |
| 17 | US-K            | Ry4 Tob.            | ND                       | Pale yellow             | C               | C                | RGHK                   | No record found          |
| 18 | US-K            | Red Oriental Tob.   | ND                       | Light yellow            | C               | C                | RGHK                   | No record found          |
| 19 | US-K            | Licorice            | ND                       | Clear w/ BT             | C               | C                | RGHK                   | No record found          |
| 20 | US-K            | Menthol             | ND                       | Clear w/ YT             | C               | C                | RGHK                   | Menthol(0mg)             |
| 21 | US-K            | Mints               | ND                       | Clear                   | C               | C                | RGHK                   | Mints(0mg)               |
| 22 | US-K            | Apple               | ND                       | Clear                   | C               | C                | RGHK                   | Apple(0mg)               |
| 23 | US-K            | Citrus Mix          | ND                       | Clear                   | C               | C                | RGHK                   | Citrus Mix(0mg)          |
| 24 | US-K            | Watermelon          | ND                       | Clear                   | C               | C                | RGHK                   | Watermelon(0mg)          |
| 25 | US-K            | Watermelon          | ND                       | Clear                   | C               | C                | RGHK                   | Watermelon(0mg)          |
| 25 | US-K            | Banana              | ND                       | Clear                   | C               | C                | RGHK                   | Banana(0mg)              |
| 27 | US-K            | Berry Mix           | ND                       | Clear                   | C               | C                | RGHK                   | Berry Mix(0mg)           |
| 28 | US-K            | Blueberry           | ND                       | Clear                   | C               | C                | RGHK                   | Blueberry(0mg)           |
| 29 | US-K            | Coffee              | ND                       | Clear                   | C               | C                | RGHK                   | Coffee(0mg)              |
| 30 | US-K            | Cola                | ND                       | Clear                   | C               | C                | RGHK                   | Cola(0mg)                |
| 31 | US-K            | Energy Drink        | ND                       | Clear w/ YT             | C               | C                | RGHK                   | Energy Drink(0mg)        |
| 32 | US-K            | Bright Tobacco      | ND                       | Clear                   | C               | C                | RGHK                   | Bright Tob(0mg)          |
| 33 | US-K            | Traditional Tob.    | ND                       | Champagne               | C               | C                | RGHK                   | Traditional Tob(0mg)     |
| 34 | US-K            | French Pipe Tob.    | ND                       | Clear w/ YT             | C               | C                | RGHK                   | French PipeT(0mg)        |
| 35 | US-K            | American Blend Tob. | ND                       | Clear w/ YT             | C               | C                | RGHK                   | Amer Blend(0mg)          |
| 36 | US-K            | Vanilla             | ND                       | Clear                   | C               | C                | RGHK                   | Vanilla(0mg)             |
| 37 | US-K            | Chocolate           | ND                       | Yellow                  | C               | C                | RGHK                   | Chocolate(0mg)           |
| 38 | US-K            | HP Overdrive        | ND                       | Dark Brown              | C               | C                | RGHK                   | No record found          |
| 39 | US-K            | HP Fruity Velocity  | ND                       | Clear                   | C               | C                | RGHK                   | No record found          |

(continued on next page)

**Supplementary Table 1 (continued)**  
**Authentic and Suspected Authentic E-cigarette Refill Fluids<sup>a</sup>**

| #  | Co <sup>b</sup> | Flavor               | [Q] (mg/mL) <sup>c</sup> | Coloration <sup>d</sup> | QR <sup>e</sup> | EAN <sup>f</sup> | Mfr. Name <sup>g</sup> | Product Name on Database |
|----|-----------------|----------------------|--------------------------|-------------------------|-----------------|------------------|------------------------|--------------------------|
| 40 | US-K            | HP summer Drift      | ND                       | Clear w/ YT             | C               | C                | RGHK                   | No record found          |
| 41 | US-K            | HP Sweet Accelerator | ND                       | Clear w/ YT             | C               | C                | RGHK                   | No record found          |
| 42 | US-K            | Q Apple              | ND                       | Clear                   | C               | C                | RGHK                   | No record found          |
| 43 | US-K            | Q Peach              | ND                       | Clear                   | C               | C                | RGHK                   | No record found          |
| 44 | US-K            | Q Menthol            | ND                       | Clear                   | C               | C                | RGHK                   | No record found          |
| 45 | US-K            | Q Berry Mix          | ND                       | Clear                   | C               | C                | RGHK                   | No record found          |
| 46 | US-K            | Q Pina Colada        | ND                       | Clear                   | C               | C                | RGHK                   | No record found          |
| 47 | US-K            | Q Cherribakki        | ND                       | Clear w/ YT             | C               | C                | RGHK                   | No record found          |
| 48 | US-K            | Q The Moment         | ND                       | Clear                   | C               | C                | RGHK                   | No record found          |
| 49 | US-K            | Q Havana Libre       | ND                       | Clear                   | C               | C                | RGHK                   | No record found          |
| 50 | US-K            | Q Blackberry Jack    | ND                       | Clear                   | C               | C                | RGHK                   | No record found          |
| 51 | US-K            | Q Double Bubble      | ND                       | Clear                   | C               | C                | RGHK                   | No record found          |
| 52 | US-K            | Q Fragola Fresca     | ND                       | Clear                   | C               | C                | RGHK                   | No record found          |
| 53 | US-K            | Q American Blend     | ND                       | Clear w/ YT             | C               | C                | RGHK                   | No record found          |
| 54 | US-K            | Q Honeydew Drop      | ND                       | Clear w/ YT             | C               | C                | RGHK                   | No record found          |
| 55 | US-K            | Q Golden Roanoke     | ND                       | Clear w/ YT             | C               | C                | RGHK                   | No record found          |
| 56 | US-K            | Q Piedmont Sunrise   | ND                       | Clear                   | C               | C                | RGHK                   | No record found          |
| 57 | US-K            | Q Turkish Tob.       | ND                       | Clear                   | C               | C                | RGHK                   | No record found          |
| 58 | US-K            | Q Traditional Tob.   | ND                       | Champagne               | C               | C                | RGHK                   | No record found          |
| 59 | US-C            | Citrus Mix           | ND                       | Clear                   | C               | C                | RGHK                   | Citrus Mix(0mg)          |
| 60 | US-C            | Cherry               | ND                       | Clear                   | C               | C                | RGHK                   | Cherry(0mg)              |
| 61 | US-C            | Menthol              | ND                       | Clear w/ YT             | C               | C                | RGHK                   | Menthol(0mg)             |
| 62 | US-C            | Apple                | ND                       | Clear                   | C               | C                | RGHK                   | Apple(0mg)               |
| 63 | US-C            | Berry Mix            | ND                       | Clear                   | C               | C                | RGHK                   | Berry Mix(0mg)           |
| 64 | US-C            | Grape                | ND                       | Clear                   | C               | C                | RGHK                   | Grape(0mg)               |
| 65 | US-C            | Coffee               | ND                       | Clear                   | C               | C                | RGHK                   | Coffee(0mg)              |
| 66 | US-C            | Strawberry           | ND                       | Clear                   | C               | C                | RGHK                   | Strawberry(0mg)          |
| 67 | US-C            | Tiramisu             | ND                       | Clear w/ YT             | C               | C                | RGHK                   | Tiramisu(0mg)            |
| 68 | US-C            | Bright Tob.          | ND                       | Clear                   | C               | C                | RGHK                   | Bright Tob(0mg)          |
| 69 | US-C            | Peach                | ND                       | Clear w/ YT             | C               | C                | RGHK                   | No record found          |
| 70 | US-C            | Cuban Cigar Tob.     | ND                       | Clear                   | C               | C                | RGHK                   | No record found          |
| 71 | US-C            | Q Apple              | ND                       | Clear                   | C               | C                | RGHK                   | No record found          |
| 72 | US-C            | Q Peach              | ND                       | Clear                   | C               | C                | RGHK                   | No record found          |
| 73 | US-C            | Q Menthol            | ND                       | Clear                   | C               | C                | RGHK                   | No record found          |
| 74 | GB-N            | Bright Tob.          | ND                       | Clear                   | C               | C                | RGHK                   | Bright Tob(0mg)          |
| 75 | GB-N            | Menthol              | ND                       | Clear w/ BT             | C               | C                | RGHK                   | Menthol(0mg)             |
| 76 | GB-N            | Apple                | ND                       | Clear                   | C               | C                | RGHK                   | Apple(0mg)               |
| 77 | GB-N            | Berry Mix            | ND                       | Clear                   | C               | C                | RGHK                   | Berry Mix(0mg)           |
| 78 | GB-N            | Peach                | ND                       | Clear                   | C               | C                | RGHK                   | No record found          |

(continued on next page)

**Supplementary Table 1 (continued)**  
**Authentic and Suspected Authentic E-cigarette Refill Fluids<sup>a</sup>**

| #  | Co <sup>b</sup> | Flavor       | [Q] (mg/mL) <sup>c</sup> | Coloration <sup>d</sup> | QR <sup>e</sup> | EAN <sup>f</sup> | Mfr. Name <sup>g</sup> | Product Name on Database |
|----|-----------------|--------------|--------------------------|-------------------------|-----------------|------------------|------------------------|--------------------------|
| 79 | GB-N            | Q Apple      | ND                       | Clear                   | C               | C                | RGHK                   | No record found          |
| 80 | GB-N            | Q Peach      | ND                       | Clear                   | C               | C                | RGHK                   | No record found          |
| 81 | GB-N            | Q Berry Mix  | ND                       | Clear                   | C               | C                | RGHK                   | No record found          |
| 82 | CN-X            | Bright Tob.  | ND                       | Clear                   | C               | C                | RGHK                   | Bright Tob(0mg)          |
| 83 | CN-X            | Menthol      | ND                       | Clear                   | C               | C                | RGHK                   | Menthol(0mg)             |
| 84 | CN-X            | Apple        | ND                       | Clear                   | C               | C                | RGHK                   | Apple(0mg)               |
| 85 | CN-X            | Citrus Mix   | ND                       | Clear                   | C               | C                | RGHK                   | Citrus Mix(0mg)          |
| 86 | CN-X            | Cherry       | ND                       | Clear                   | C               | C                | RGHK                   | Cherry(0mg)              |
| 87 | CN-X            | Berry Mix    | ND                       | Clear                   | C               | C                | RGHK                   | Berry Mix(0mg)           |
| 88 | CN-X            | Strawberry   | ND                       | Clear                   | C               | C                | RGHK                   | Strawberry(0mg)          |
| 89 | CN-X            | Grape        | ND                       | Clear                   | C               | C                | RGHK                   | Grape(0mg)               |
| 90 | CN-X            | Coffee       | ND                       | Clear                   | C               | C                | RGHK                   | Coffee(0mg)              |
| 91 | CN-X            | Tiramisu     | ND                       | Clear w/ YT             | C               | C                | RGHK                   | Tiramisu(0mg)            |
| 92 | US-K            | Turkish Tob. | ND                       | Clear                   | NC              | C                | RGHK                   | Turkish Tob. (0mg)       |

**Note.**

a #1 – 91 were verified to be authentic using all criteria. #92 could not be verified using the QR code

b Co =Country and location of product purchase (NG-L = Nigeria, Lagos; US-K = USA, Kansas; US-C = US, California; CN-X = China, Xiamen)

c [Q] = Quantified nicotine concentration ( $\pm$  standard deviation) using HPLC (ND = Not Detected)

d Coloration = Color of the refill fluids (YT = yellow tint; GT = green tint; BT = brown tint)

e QR = Availability and verification of manufacturer's Quick Response Code (C = Correct code = Verified; NC/NB = No Code/No Box = Unverified)

f EAN = Availability and verification of company and product information using the European Article Number barcode (IC = Incorrect; NB = None)

g Mfr. Name = Name of manufacturer to which product EAN barcode is linked; RGHK = Ritchy Group Ltd HK; SLHK = Spoilt Ltd HK; RC:13 = Illegal/None; N/A = Not Available
